# Supplementary material
Source: bioRxiv or medRxiv preprint supplement (https://medrxiv.org/highwire/filestream/88453/field_highwire_adjunct_files/0/2020.07.02.20144006-1.pdf)

# Supplementary information for “Estimating antibiotic cross-resistance patterns in hospitalized patients through Bayesian network modelling”

Stacey S Cherny<sup>1,2</sup>, Daniel Nevo<sup>3</sup>, Avi Baraz<sup>1,2,3</sup>, Shoham Baruch<sup>1,2</sup>, Ohad Lewin-Epstein<sup>4</sup>,  
Gideon Y Stein<sup>5,6</sup>, Uri Obolski<sup>1,2,\*</sup>

<sup>1</sup>School of Public Health, Tel Aviv University, Tel Aviv, Israel

<sup>2</sup>Porter School of the Environment and Earth Sciences, Tel Aviv University, Tel Aviv, Israel

<sup>3</sup>Department of Statistics and Operations Research, Tel Aviv University, Tel Aviv, Israel

<sup>4</sup>Department of Molecular Biology and Ecology of Plants, Tel Aviv University, Tel Aviv, Israel

<sup>5</sup>Internal Medicine “A”, Meir Medical Center, Kfar Saba, Israel

<sup>6</sup>Sackler School of Medicine, Tel Aviv University, Tel Aviv, Israel

\*to whom correspondence should be addressed: [uriobols@tauex.tau.ac.il](mailto:uriobols@tauex.tau.ac.il)

**Table S1: Antibiotic resistances excluded from analysis due to redundancies or missing data, along with their tetrachoric correlations with highly-correlated included variables**

| <b>Dataset</b>       | <b>Antibiotic removed</b> | <b>Antibiotic(s) it is correlated with</b> | <b>Tetrachoric correlation</b> |
|----------------------|---------------------------|--------------------------------------------|--------------------------------|
| <i>E. coli</i>       | Amikacin                  | Ampicillin                                 | 0.97                           |
| <i>E. coli</i>       | Ceftazidime               | Cefuroxime                                 | 1.00                           |
| <i>E. coli</i>       | Ceftriaxone               | Cefuroxime                                 | 1.00                           |
| <i>E. coli</i>       | Cefuroxime                | Ciprofloxacin                              | 0.79                           |
| <i>E. coli</i>       | Cefuroxime                | Ofloxacin                                  | 1.00                           |
| <i>E. coli</i>       | Ertapenem                 | Cefuroxime                                 | 0.94                           |
| <i>K. pneumoniae</i> | Ceftazidime               | Cefuroxime                                 | 1.00                           |
| <i>K. pneumoniae</i> | Ceftriaxone               | Cefuroxime                                 | 1.00                           |
| <i>K. pneumoniae</i> | Ertapenem                 | Cefuroxime                                 | 0.94                           |
| <i>K. pneumoniae</i> | Cefuroxime                | Ciprofloxacin                              | 0.82                           |
| <i>K. pneumoniae</i> | Sulf-Trim                 | Ciprofloxacin                              | 0.78                           |
| <i>K. pneumoniae</i> | Sulf-Trim                 | Gentamicin                                 | 0.83                           |
| <i>P. aeruginosa</i> | Amikacin                  | Gentamicin                                 | 0.94                           |
| <i>P. aeruginosa</i> | Amikacin                  | Ofloxacin                                  | 0.79                           |
| <i>P. aeruginosa</i> | Pipera                    | Ceftazidime                                | 0.95                           |
| <i>P. mirabilis</i>  | Amikacin                  | Gentamicin                                 | 0.69                           |
| CoNS                 | Clindamycin               | Erythromycin                               | 0.95                           |
| CoNS                 | Clindamycin               | Ofloxacin                                  | 0.84                           |

Note: Sulf-Trim = sulfamethoxazole-trimethoprim

**Table S2: The maximum number of parents sufficient to reach the maximum likelihood seen, the number of arcs in this model, and the number of arcs present in at least 50% of the simulations, representing the final models presented, for each of the 5 bacteria analyzed.**

| Bacteria                               | Max parents needed | Initial # of arcs | Arcs in 50% of simulations |
|----------------------------------------|--------------------|-------------------|----------------------------|
| <i>Escherichia coli</i>                | 4                  | 23                | 21                         |
| <i>Klebsiella pneumoniae</i>           | 3                  | 10                | 10                         |
| <i>Pseudomonas aeruginosa</i>          | 4                  | 12                | 12                         |
| <i>Proteus mirabilis</i>               | 3                  | 17                | 17                         |
| <i>Staphylococcus coag. neg. group</i> | 4                  | 26                | 18                         |

Figure S1: Consistency matrix showing proportion of models which contain a given arc. Hospitalized = Log(Days Hospitalized + 1); AMK = amikacin; AMP = ampicillin; CAZ = ceftazidime; CXM = cefuroxime; CHL = chloramphenicol; CIP = ciprofloxacin; ERY = erythromycin; Fusid = fusidic acid; GEN = gentamicin; IPM = imipenem; OFX = ofloxacin; OXA = oxacillin; Sulf-Trim = sulfamethoxazole-trimethoprim. The sign and proportion of arcs is represented by color.

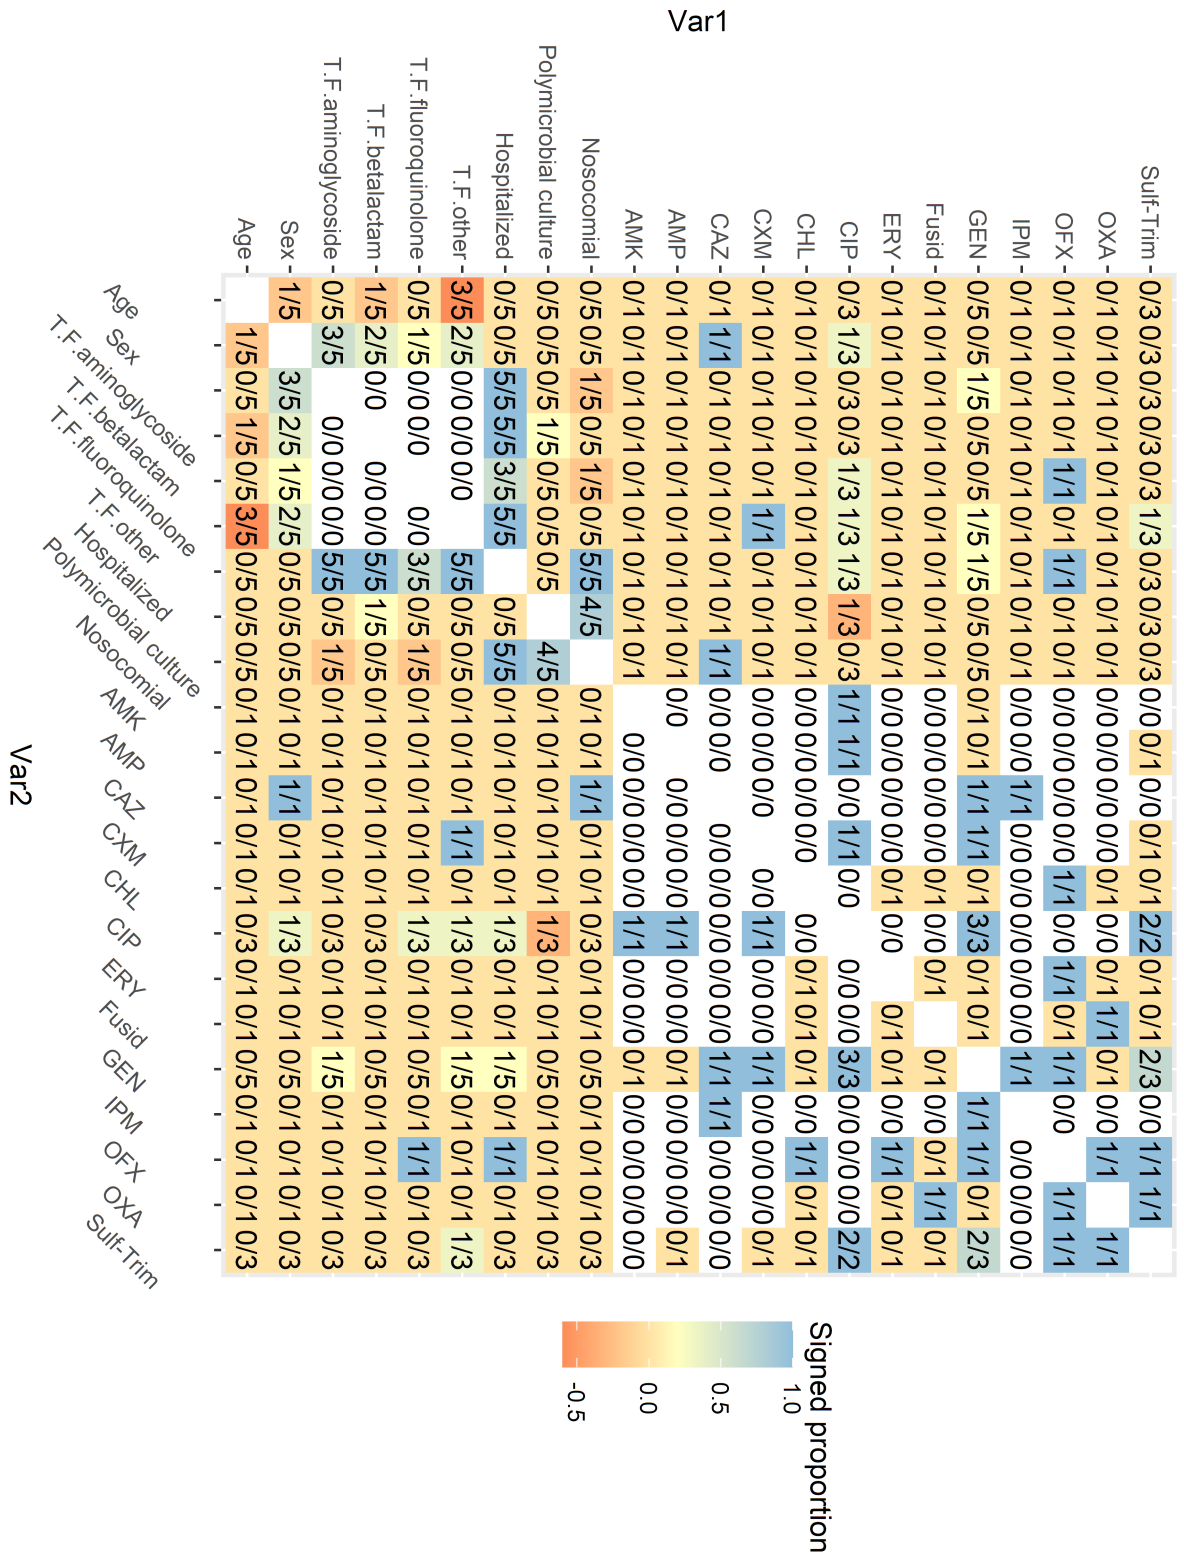

Supplement: Supplementary file [file 2020.07.02.20144006-1.pdf]
